# Supplementary material for: A bioinspired injectable antioxidant hydrogel for prevention of postoperative adhesion
Source: Royal Society of Chemistry journal article supplement (doi:10.1039/d4tb00805g), 2024-01-01
Supplement: d4tb00805g1.pdf [file d4tb00805g1.pdf]

# Bioinspired injectable antioxidant hydrogel for prevention of postoperative adhesion

Lei Yuan<sup>a</sup>, Hongxiu Wei<sup>a</sup>, ZhongJing Pan<sup>b</sup>, Xiaobo Deng<sup>a</sup>, Lin Yang<sup>a</sup>, Yanchao Wang<sup>c</sup>, Dan Lu<sup>b</sup>, Zhen Li<sup>a</sup>, Feng Luo<sup>a\*</sup>, Jiehua Li<sup>a</sup>, and Hong Tan<sup>a</sup>

<sup>a</sup> College of Polymer Science and Engineering, State Key Laboratory of Polymer Materials Engineering, Med-X Center for Materials, Sichuan University, Chengdu 610065, China

<sup>b</sup> Department of Otorhinolaryngology, Head & Neck Surgery, West China Hospital, Sichuan University, Sichuan, Chengdu 610041, China

<sup>c</sup> Department of Neurosurgery, West China Hospital, Sichuan University, Chengdu, Sichuan, 610041, China

\* E-mail: fengluo@scu.edu.cn

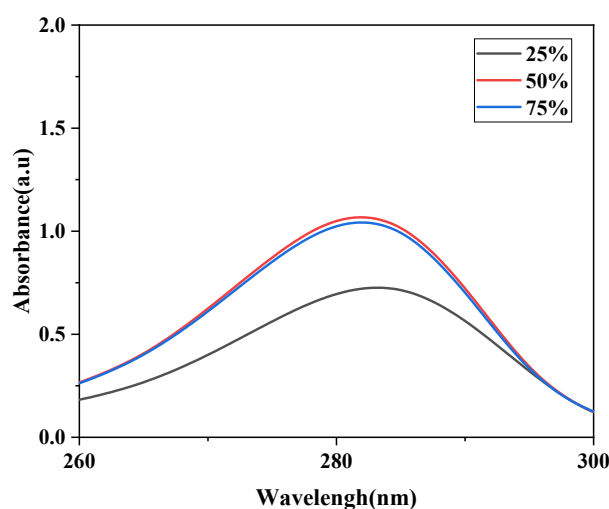

Figure S1 UV spectra of different dopamine-grafting oxidized hyaluronic acids

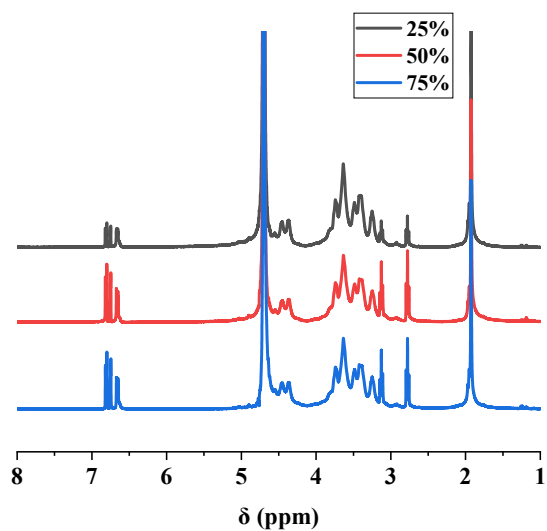

Figure S2 <sup>1</sup>H-NMR Spectra of different dopamine-grafting oxidized hyaluronic acids

Table S1 Molar ratios of raw materials for polyurethane emulsions

| Ratios(mol) | PCL | LDI | DMPA | TEA | ADH |
|-------------|-----|-----|------|-----|-----|
| PU          | 1.0 | 2.7 | 1.0  | 1.0 | 0   |
| PU-ADH      | 1.0 | 2.7 | 1.0  | 1.0 | 1.5 |

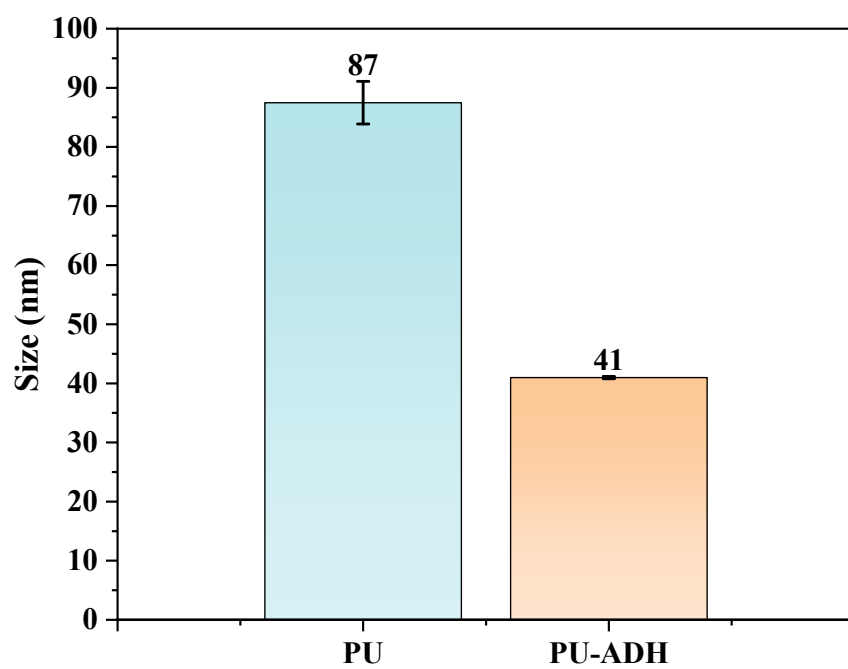

Figure S3 Particle size of PU and PU-ADH emulsions

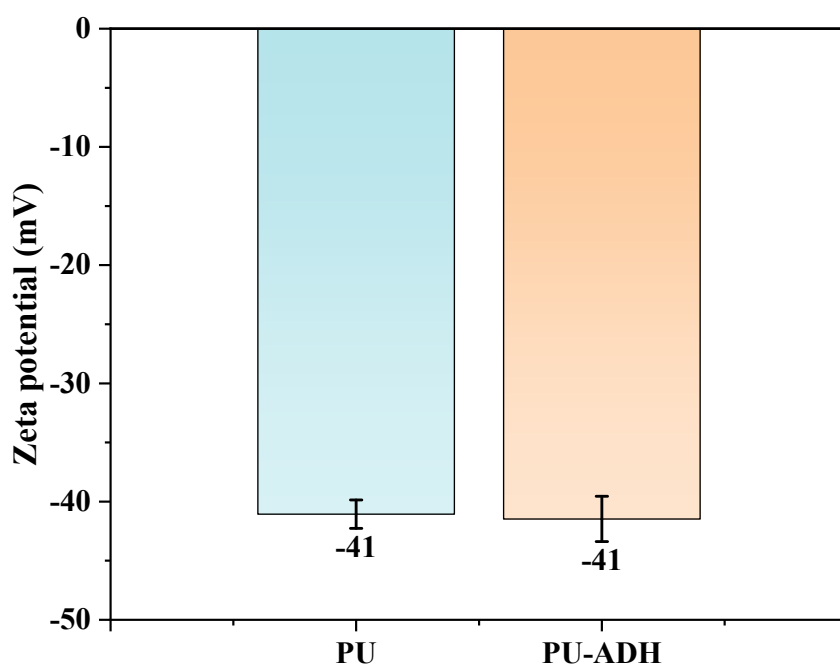

Figure S4 Potential of PU and PU-ADH emulsions

Table S2 Different proportions of PU-OHA-D hydrogel

| Ratio | PU-ADH |     |     | OHA |    | OHA-D |    | Final mass fraction |
|-------|--------|-----|-----|-----|----|-------|----|---------------------|
|       | 10%    | 20% | 30% | 3%  | 5% | 3%    | 5% |                     |
| 1     | /      | 6   | /   | /   | 4  | /     | 0  | 14.0%               |
| 2     | /      | 6   | /   | /   | 3  | /     | 1  | 14.0%               |
| 3     | /      | 6   | /   | /   | 2  | /     | 2  | 14.0%               |
| 4     | /      | 2   | /   | /   | 3  | /     | 1  | 10.0%               |
| 5     | /      | 4   | /   | /   | 3  | /     | 1  | 12.5%               |
| 6     | /      | 8   | /   | /   | 3  | /     | 1  | 15.0%               |
| 7     | 6      | /   | /   | /   | 3  | /     | 1  | 8.0%                |
| 8     | /      | /   | 6   | /   | 3  | /     | 1  | 20.0%               |
| 9     | /      | 6   | /   | 3   | /  | 1     | /  | 13.2%               |

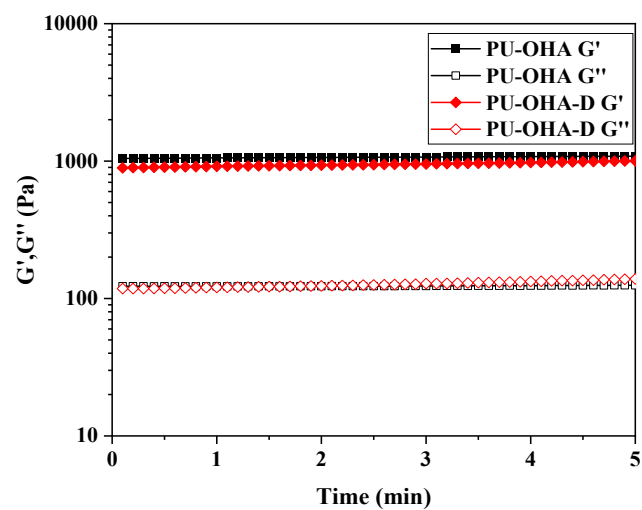

Figure S5 Curve of G' and G'' of hydrogel changing with time

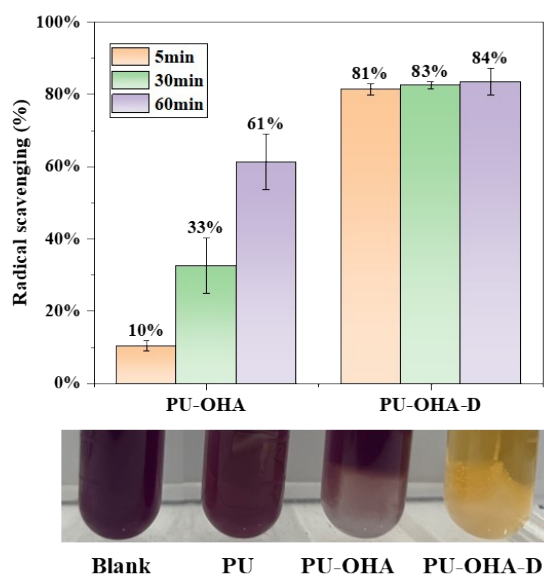

Figure S6 DPPH free radical scavenging efficiency of hydrogels at 5 min, 30 min, and 60 min along with corresponding macroscopic images at 5 min.

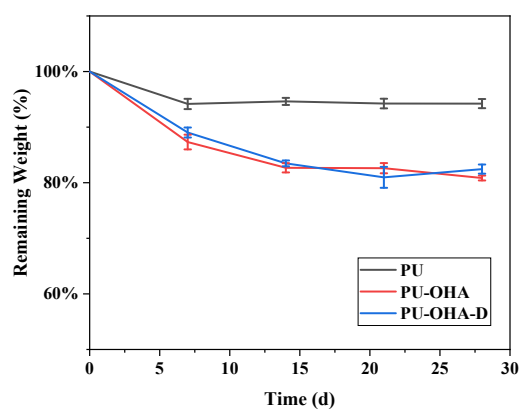

Figure S7 Degradation curves of lyophilized PU-OHA and PU-OHA-D in PBS buffer

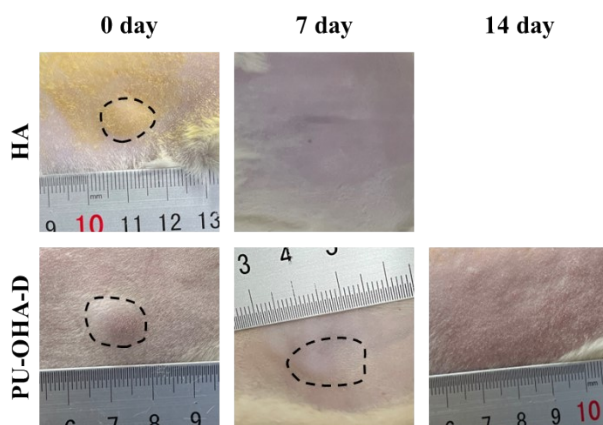

Figure S8 Subcutaneous degradation of HA and PU-OHA-D hydrogels in rats

Table S3 Peritoneal adhesion score grade for the in vivo adhesion test

| Score | The condition of abdominal-blind cecum adhesion |
|-------|-------------------------------------------------|
| 0     | No adhesions                                    |
| 1     | Very few adhesions                              |
| 2     | small to moderate adhesion                      |
| 3     | Moderate to substantial adhesions               |
| 4     | Severe adhesions                                |

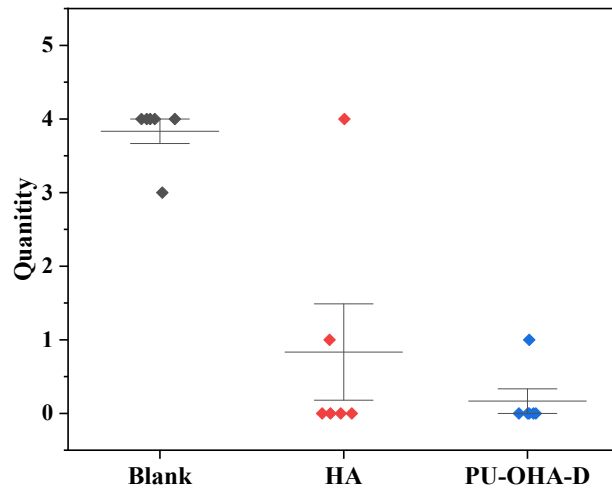

Figure S9 Abdominal-blind cecum adhesion and score statistics 14 days after surgery.
